# Supplementary material
Source: PubMed Central journal article supplement (PMC4580552)
Supplement: supp_dju055_jnci_JNCI_13_1121_s01.pdf [file supp_dju055_jnci_JNCI_13_1121_s01.pdf]

Supplementary Table 1. Distribution of ER, PR, and HER2 Status Among Breast Cancer Patients, SEER-18 Excluding Alaska, 2010

| Category   | ER Status |          | PR Status |          | HER2 Status |          |
|------------|-----------|----------|-----------|----------|-------------|----------|
|            | Count     | Column % | Count     | Column % | Count       | Column % |
| Positive   | 44 595    | 77.6%    | 37 826    | 65.8%    | 7643        | 13.3%    |
| Negative   | 9714      | 16.9%    | 15 953    | 27.8%    | 43 242      | 75.2%    |
| Borderline | 62        | 0.1%     | 191       | 0.3%     | 1566        | 2.7%     |
| Unknown    | 3112      | 5.4%     | 3513      | 6.1%     | 5032        | 8.8%     |
| Total      | 57 483    | 100.0%   | 57 483    | 100.0%   | 57 483      | 100.0%   |
|            |           |          |           |          |             |          |

Supplementary Table 2. Classification of Breast Cancer Molecular Subtypes Based on Combination of HER2, ER, PR Status, SEER-18 Excluding Alaska, 2010

| Subtype                                   | HER2 Status | ER Status | PR Status | Frequency |
|-------------------------------------------|-------------|-----------|-----------|-----------|
| <b>HR+/HER2-</b><br><b>N = 36 810</b>     | Negative    | Positive  | Positive  | 31 189    |
|                                           | Negative    | Positive  | Negative  | 4844      |
|                                           | Negative    | Positive  | Unknown   | 407       |
|                                           | Negative    | Negative  | Positive  | 354       |
|                                           | Negative    | Unknown   | Positive  | 16        |
| <b>Triple Negative</b><br><b>N = 6193</b> | Negative    | Negative  | Negative  | 6193      |
| <b>HR+/HER2+</b><br><b>N = 5240</b>       | Positive    | Positive  | Positive  | 3605      |
|                                           | Positive    | Positive  | Negative  | 1426      |
|                                           | Positive    | Positive  | Unknown   | 61        |
|                                           | Positive    | Negative  | Positive  | 144       |
|                                           | Positive    | Unknown   | Positive  | 4         |
| <b>HR-/HER2+</b><br><b>N = 2328</b>       | Positive    | Negative  | Negative  | 2328      |
| <b>Unknown</b><br><b>N = 6912</b>         | Positive    | Negative  | Unknown   | 9         |
|                                           | Positive    | Unknown   | Negative  | 15        |
|                                           | Positive    | Unknown   | Unknown   | 51        |
|                                           | Negative    | Negative  | Unknown   | 30        |
|                                           | Negative    | Unknown   | Negative  | 33        |
|                                           | Negative    | Unknown   | Unknown   | 176       |
|                                           | Unknown     | Positive  | Positive  | 2472      |
|                                           | Unknown     | Positive  | Negative  | 501       |
|                                           | Unknown     | Positive  | Unknown   | 90        |
|                                           | Unknown     | Negative  | Positive  | 39        |
|                                           | Unknown     | Negative  | Negative  | 604       |
|                                           | Unknown     | Negative  | Unknown   | 13        |
|                                           | Unknown     | Unknown   | Positive  | 3         |
|                                           | Unknown     | Unknown   | Negative  | 9         |
| Unknown                                   | Unknown     | Unknown   | 2867      |           |

HER2 status: positive = positive; negative = negative; unknown = borderline + unknown codes (997, 998, 999)

ER status: positive = positive + borderline; negative = negative; unknown = unknown codes (997, 998, 999)

PR status: positive = positive + borderline; negative = negative; unknown = unknown codes (997, 998, 999)

Supplementary Table 3. Age-Specific Incidence Rates per 100,000 of Breast Cancer by Molecular Subtypes and Race/Ethnicity, SEER-18 Excluding Alaska, 2010

| Subtype            | Age   | NH White       |                | NH Black       |                | NH API        |                | Hispanic     |                |
|--------------------|-------|----------------|----------------|----------------|----------------|---------------|----------------|--------------|----------------|
|                    |       | Rate           | 95% CI         | Rate           | 95% CI         | Rate          | 95% CI         | Rate         | 95% CI         |
| HR+/<br>HER2-      | 20-24 | 0.5            | (0.2, 1.0)     | 0.0            | (0, 0.9)       | 0.7           | (0.1, 2.5)     | 0.4          | (0.1, 1.1)     |
|                    | 25-29 | 3.7            | (2.8, 4.8)     | 4.1            | (2.3, 6.7)     | 3.9           | (2.1, 6.6)     | 2.9          | (1.9, 4.4)     |
|                    | 30-34 | 12.6           | (10.8, 14.6)   | 18.0           | (13.9, 23.0)   | 12.7          | (9.2, 17.0)    | 8.1          | (6.2, 10.4)    |
|                    | 35-39 | 31.2           | (28.3, 34.2)   | 27.5           | (22.4, 33.5)   | 30.4          | (25.0, 36.6)   | 20.4         | (17.3, 24.0)   |
|                    | 40-44 | 78.9           | (74.6, 83.4)   | 67.2           | (59.1, 76.0)   | 76.2          | (67.2, 86.1)   | 43.1         | (38.2, 48.4)   |
|                    | 45-49 | 128.2          | (123.1, 133.5) | 86.1           | (77.1, 95.8)   | 98.8          | (88.3, 110.2)  | 80.3         | (73.2, 87.9)   |
|                    | 50-54 | 146.0          | (140.6, 151.5) | 105.6          | (95.3, 116.6)  | 119.7         | (107.8, 132.5) | 92.6         | (84.3, 101.6)  |
|                    | 55-59 | 176.4          | (170.2, 182.6) | 146.1          | (133.0, 160.2) | 118.5         | (106.0, 132.2) | 111.8        | (101.3, 123.2) |
|                    | 60-64 | 245.5          | (237.9, 253.3) | 163.7          | (148.0, 180.5) | 176.5         | (159.6, 194.7) | 153.2        | (138.9, 168.5) |
|                    | 65-69 | 311.7          | (301.7, 321.9) | 234.0          | (211.4, 258.3) | 212.1         | (189.9, 236.2) | 191.7        | (172.7, 212.2) |
|                    | 70-74 | 332.3          | (320.5, 344.5) | 225.9          | (200.4, 253.7) | 181.8         | (158.6, 207.4) | 188.9        | (167.2, 212.6) |
|                    | 75-79 | 342.7          | (329.6, 356.2) | 236.8          | (206.8, 270.0) | 176.4         | (150.8, 205.1) | 190.3        | (165.4, 217.9) |
|                    | 80-84 | 314.4          | (301.0, 328.2) | 224.4          | (190.3, 262.9) | 160.2         | (132.4, 192.1) | 184.3        | (155.7, 216.6) |
| 85+                | 216.9 | (206.6, 227.6) | 162.5          | (133.8, 195.5) | 97.7           | (75.3, 124.8) | 131.3          | (105.2, 162) |                |
| Triple<br>Negative | 20-24 | 0.0            | (0, 0.3)       | 0.2            | (0, 1.4)       | 0.0           | (0, 1.3)       | 0.1          | (0, 0.7)       |
|                    | 25-29 | 1.8            | (1.2, 2.7)     | 2.7            | (1.3, 5.0)     | 0.3           | (0, 1.7)       | 1.2          | (0.5, 2.2)     |
|                    | 30-34 | 4.5            | (3.5, 5.8)     | 6.9            | (4.5, 10.2)    | 3.2           | (1.6, 5.7)     | 4.5          | (3.1, 6.3)     |
|                    | 35-39 | 9.7            | (8.2, 11.5)    | 19.4           | (15.2, 24.6)   | 6.6           | (4.2, 9.8)     | 7.7          | (5.8, 10.0)    |
|                    | 40-44 | 15.6           | (13.7, 17.7)   | 24.8           | (20.0, 30.4)   | 10.0          | (6.9, 14.0)    | 13.4         | (10.7, 16.5)   |
|                    | 45-49 | 19.5           | (17.5, 21.6)   | 37.0           | (31.2, 43.6)   | 15.0          | (11.1, 19.8)   | 18.6         | (15.2, 22.4)   |

|               |       |              |              |              |              |             |              |             |              |
|---------------|-------|--------------|--------------|--------------|--------------|-------------|--------------|-------------|--------------|
|               | 50-54 | 25.3         | (23.1, 27.7) | 51.6         | (44.5, 59.4) | 21.0        | (16.2, 26.7) | 24.3        | (20.1, 29.2) |
|               | 55-59 | 29.0         | (26.6, 31.6) | 55.0         | (47.0, 63.9) | 17.6        | (12.9, 23.3) | 22.7        | (18.1, 28.1) |
|               | 60-64 | 35.4         | (32.6, 38.5) | 68.9         | (58.9, 80.2) | 16.8        | (11.9, 23.1) | 24.3        | (18.8, 30.9) |
|               | 65-69 | 36.8         | (33.4, 40.4) | 69.5         | (57.5, 83.3) | 23.6        | (16.6, 32.6) | 28.8        | (21.7, 37.4) |
|               | 70-74 | 38.5         | (34.6, 42.8) | 65.2         | (51.9, 81.0) | 18.1        | (11.3, 27.4) | 33.1        | (24.4, 43.9) |
|               | 75-79 | 35.2         | (31.1, 39.7) | 58.4         | (44.0, 76)   | 18.8        | (11.1, 29.7) | 19.1        | (11.8, 29.2) |
|               | 80-84 | 34.5         | (30.2, 39.3) | 51.3         | (35.8, 71.4) | 22.1        | (12.6, 35.9) | 28.8        | (18.3, 43.3) |
|               | 85+   | 21.8         | (18.6, 25.4) | 34.8         | (22.3, 51.8) | 19.9        | (10.6, 33.9) | 21.1        | (11.6, 35.5) |
| HR+/<br>HER2+ | 20-24 | 0.1          | (0.0, 0.5)   | 0.0          | (0, 0.9)     | 0.0         | (0, 1.3)     | 0.0         | (0, 0.5)     |
|               | 25-29 | 1.8          | (1.2, 2.6)   | 1.9          | (0.8, 3.9)   | 1.8         | (0.7, 3.9)   | 0.9         | (0.4, 1.8)   |
|               | 30-34 | 5.3          | (4.2, 6.7)   | 5.5          | (3.4, 8.6)   | 3.2         | (1.6, 5.7)   | 2.3         | (1.3, 3.6)   |
|               | 35-39 | 10.6         | (9.0, 12.5)  | 11.4         | (8.2, 15.5)  | 6.8         | (4.4, 10.1)  | 5.8         | (4.2, 7.8)   |
|               | 40-44 | 15.7         | (13.8, 17.8) | 17.3         | (13.3, 22.0) | 14.1        | (10.4, 18.7) | 9.3         | (7.1, 11.9)  |
|               | 45-49 | 22.0         | (19.9, 24.3) | 19.8         | (15.6, 24.7) | 22.6        | (17.8, 28.4) | 15.8        | (12.7, 19.4) |
|               | 50-54 | 23.3         | (21.2, 25.5) | 18.2         | (14.1, 23.1) | 28.1        | (22.5, 34.6) | 17.3        | (13.8, 21.5) |
|               | 55-59 | 25.1         | (22.9, 27.6) | 24.6         | (19.4, 30.8) | 24.9        | (19.3, 31.5) | 22.2        | (17.6, 27.5) |
|               | 60-64 | 30.5         | (27.9, 33.4) | 32.4         | (25.7, 40.4) | 26.5        | (20.3, 34.2) | 17.8        | (13.2, 23.5) |
|               | 65-69 | 33.2         | (30.0, 36.7) | 35.0         | (26.7, 45.2) | 21.1        | (14.5, 29.6) | 27.7        | (20.8, 36.2) |
|               | 70-74 | 31.4         | (27.8, 35.3) | 31.8         | (22.7, 43.3) | 25.5        | (17.3, 36.2) | 26.9        | (19.1, 36.7) |
|               | 75-79 | 28.8         | (25.1, 33.0) | 30.8         | (20.6, 44.2) | 18.8        | (11.1, 29.7) | 18.2        | (11.1, 28.1) |
|               | 80-84 | 26.8         | (23.0, 31.0) | 33.7         | (21.4, 50.6) | 6.9         | (2.2, 16.1)  | 12.5        | (6.0, 23.1)  |
| 85+           | 22.0  | (18.8, 25.6) | 23.2         | (13.3, 37.7) | 13.7         | (6.3, 26.1) | 10.6         | (4.2, 21.8) |              |
| HR-/<br>HER2+ | 20-24 | 0.1          | (0, 0.5)     | 0.0          | (0, 0.9)     | 0.3         | (0, 1.9)     | 0.0         | (0, 0.5)     |
|               | 25-29 | 0.5          | (0.2, 0.8)   | 0.8          | (0.2, 2.4)   | 0.0         | (0, 1.1)     | 0.9         | (0.4, 1.8)   |

|  |       |      |              |      |              |      |              |      |             |
|--|-------|------|--------------|------|--------------|------|--------------|------|-------------|
|  |       |      | 1.0)         |      |              |      |              |      |             |
|  | 30–34 | 1.4  | (0.8, 2.1)   | 2.5  | (1.1, 4.7)   | 2.0  | (0.8, 4.2)   | 1.9  | (1.0, 3.1)  |
|  | 35–39 | 4.4  | (3.4, 5.7)   | 4.4  | (2.5, 7.2)   | 3.0  | (1.5, 5.4)   | 2.8  | (1.7, 4.3)  |
|  | 40–44 | 4.9  | (3.9, 6.1)   | 7.3  | (4.8, 10.6)  | 5.3  | (3.1, 8.4)   | 5.5  | (3.8, 7.6)  |
|  | 45–49 | 7.1  | (5.9, 8.4)   | 13.1 | (9.8, 17.2)  | 9.2  | (6.2, 13.1)  | 6.9  | (4.9, 9.4)  |
|  | 50–54 | 10.6 | (9.2, 12.1)  | 11.1 | (8.0, 15.1)  | 18.1 | (13.6, 23.5) | 8.5  | (6.1, 11.5) |
|  | 55–59 | 11.6 | (10.0, 13.2) | 16.2 | (12.0, 21.3) | 18.7 | (13.9, 24.5) | 13.0 | (9.6, 17.2) |
|  | 60–64 | 14.2 | (12.4, 16.2) | 13.5 | (9.3, 19.0)  | 17.7 | (12.6, 24.1) | 8.0  | (5.0, 12.1) |
|  | 65–69 | 12.2 | (10.3, 14.4) | 16.0 | (10.6, 23.3) | 12.1 | (7.3, 19.0)  | 9.2  | (5.5, 14.6) |
|  | 70–74 | 13.2 | (10.9, 15.8) | 25.5 | (17.4, 35.9) | 9.0  | (4.5, 16.2)  | 6.9  | (3.3, 12.7) |
|  | 75–79 | 14.6 | (12.0, 17.6) | 20.2 | (12.1, 31.5) | 11.5 | (5.7, 20.5)  | 14.6 | (8.3, 23.7) |
|  | 80–84 | 8.9  | (6.8, 11.5)  | 10.3 | (4.1, 21.2)  | 11.0 | (4.8, 21.8)  | 7.5  | (2.8, 16.4) |
|  | 85+   | 9.2  | (7.1, 11.6)  | 4.4  | (0.9, 12.7)  | 3.1  | (0.4, 11.0)  | 3.0  | (0.4, 10.9) |
